# Supplementary material for: Effect of the coexistence of albumin and H2O2on the corrosion of biomedical cobalt alloys in physiological saline
Source: Royal Society of Chemistry journal article supplement (doi:10.1039/c9ra05699h), 2019-01-01
Supplement: c9ra05699h1.pdf [file c9ra05699h1.pdf]

Table 1. The limit of detection (LOD) and limit of quantification (LOQ) for ICP-MS measurements

| element | Co    | Cr    | Mo    | Ni    |
|---------|-------|-------|-------|-------|
| LOD/ppb | 0.024 | 0.115 | 0.086 | 0.097 |
| LOQ/ppb | 0.081 | 0.482 | 0.228 | 0.324 |

Table 2. Summarisation of metal release concentrations of Co-28Cr-6Mo and Co-35Ni-20Cr-10Mo alloys after 4 months immersion in PS, PS+albumin, PS+H<sub>2</sub>O<sub>2</sub> and PS+albumin+H<sub>2</sub>O<sub>2</sub> at 37 °C, the unit is ppb.

|                          |                                          | Co        | Cr        | Mo        | Ni         | Total      |
|--------------------------|------------------------------------------|-----------|-----------|-----------|------------|------------|
| <b>Co-28Cr-6Mo</b>       | PS                                       | 59.9±8.1  | 2.9±0.5   | 4.5±0.3   | /          | 67.3±7.2   |
|                          | PS+albumin                               | 62.4±2.6  | 8.5±0.5   | 5.1±0.1   | /          | 76.0±2.0   |
|                          | PS+H <sub>2</sub> O <sub>2</sub>         | 123.4±0.1 | 36.9±1.3  | 13.0±0.8  | /          | 173.3±1.1  |
|                          | PS+albumin+H <sub>2</sub> O <sub>2</sub> | 162.0±7.5 | 42.4±2.8  | 13.8±0.6  | /          | 218.2±6.7  |
| <b>Co-35Ni-20Cr-10Mo</b> | PS                                       | 142.3±5.0 | 6.3±0.8   | 49.8±9.8  | 93.4±3.4   | 291.8±7.2  |
|                          | PS+albumin                               | 167.9±5.2 | 11.1±2.7  | 51.7±5.1  | 125.5±6.2  | 356.2±5.2  |
|                          | PS+H <sub>2</sub> O <sub>2</sub>         | 237.3±9.2 | 99.9±8.2  | 121.6±1.5 | 162.4±10.9 | 621.2±8.6  |
|                          | PS+albumin+H <sub>2</sub> O <sub>2</sub> | 487.2±5.0 | 114.6±7.7 | 256.8±7.6 | 430.9±5.0  | 1289.5±6.6 |

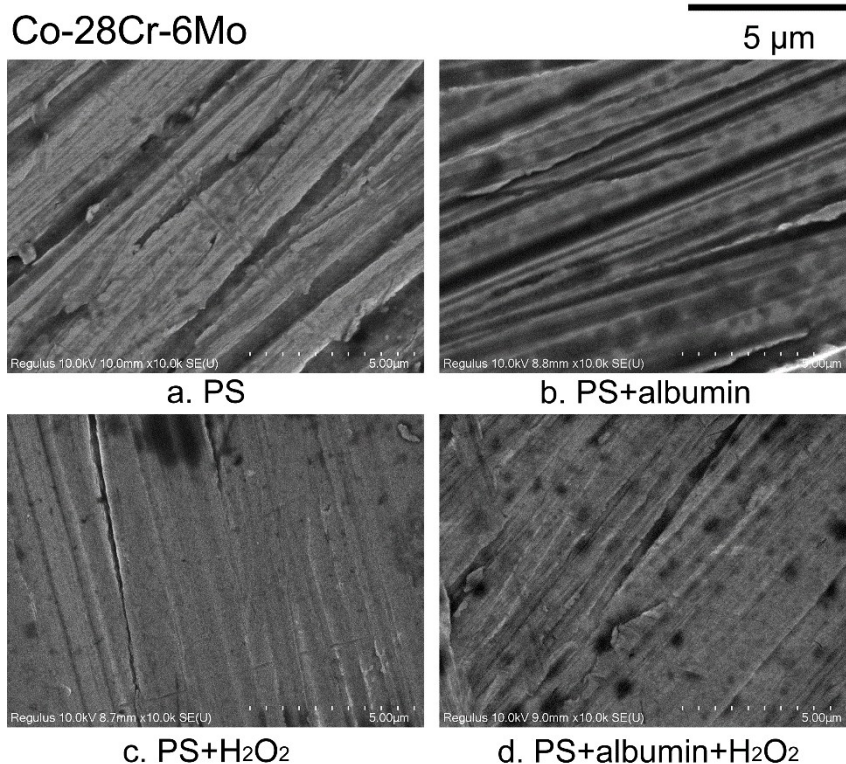

Figure 1. SEM images of the surface of Co-28Cr-6Mo discs in (a) PS, (b) PS+albumin, (c) PS+H<sub>2</sub>O<sub>2</sub> and (d) PS+albumin+H<sub>2</sub>O<sub>2</sub> after 4 months immersion at 37 °C

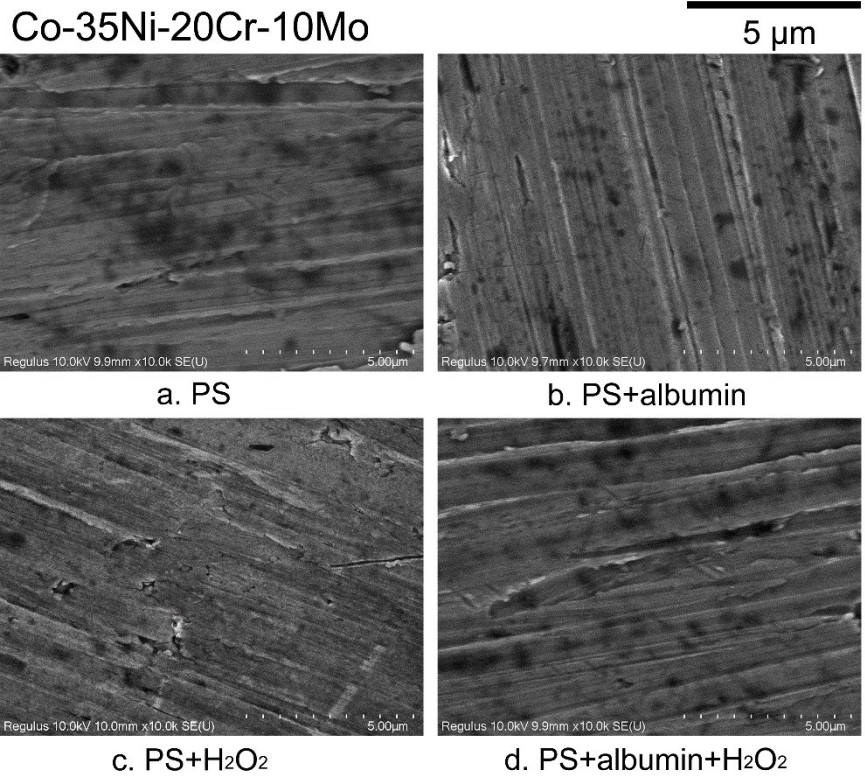

Figure 2. SEM images of the surface of Co-35Ni-20Cr-10Mo discs in (a) PS, (b) PS+albumin, (c) PS+H<sub>2</sub>O<sub>2</sub> and (d) PS+albumin+H<sub>2</sub>O<sub>2</sub> after 4 months immersion at 37 °C

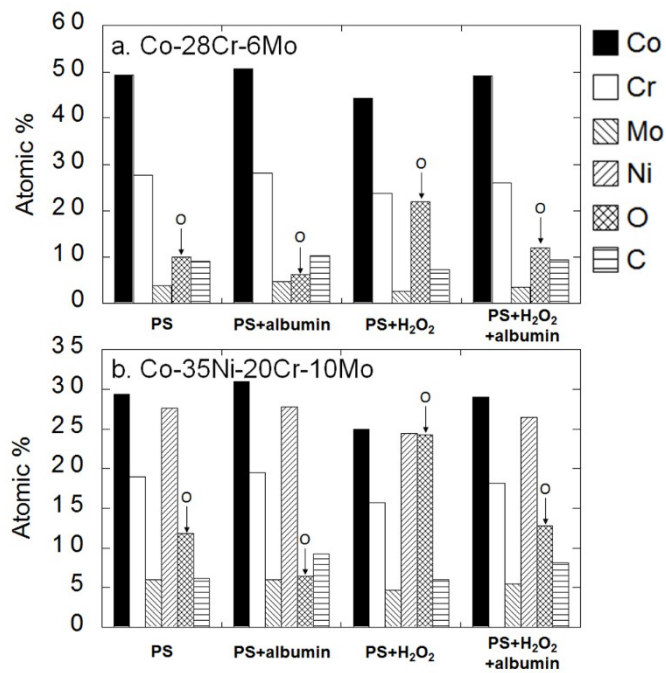

Figure 3. Atomic percentage on the surface of (a) Co-28Cr-6Mo and (b) Co-35Ni-20Cr-10Mo in PS, PS+albumin, PS+H<sub>2</sub>O<sub>2</sub> and PS+albumin+H<sub>2</sub>O<sub>2</sub> after 4 months immersion at 37 °C
